# Supplementary material
Source: publisher figshare collection journal article supplement (https://sage.figshare.com/ndownloader/files/38942779)
Supplement: Supplementary file 1 [file 38942779]

## Sheet: NaN criterion
Features	NaN values
SampleID	0
CHROM	0
POS	0
REF	0
ALT	0
Consequence	0
IMPACT	0
SYMBOL	0
QUAL	0
FILTER	0
AS_SB_TABLE	0
DP	0
GERMQ	0
MBQ	0
MERL	0
MMQ	0
MPOS	0
POPAF	0
TLOD	0
Sample.GT	0
Sample.AD	0
Sample.AF	0
Sample.DP	0
Sample.F1R2	0
Sample.F2R1	0
Sample.SB	0
positions	0
Priority	0
Allele	0
Gene	0
Feature_type	0
Feature	0
BIOTYPE	0
HGVSC	0
HGVSP	2.36786
CDNA_position	2.00909
Protein_position	2.00909
Amino acids	2.36786
Codons	2.36786
Existing_variation	32.2172
ALLELE_NUM	0
DISTANCE	100
STRAND	0
FLAGS	98.8759
VARIANT_CLASS	0
HGNC_ID	0.023918
CANONICAL	36.7376
TSL	4.68787
CCDS	8.84956
ENSP	0.119589
SWISSPROT	7.03181
TREMBL	75.9627
UNIPARC	0.191342
UNIPROT ISOFORM	43.2672
GENE_PHENO	64.53
SIFT	18.0579
Polyphen	17.9861
DOMAINS	4.95097
HGVS_OFFSET	94.9055
AF	82.7792
AFR_AF	82.9467
AMR_AF	82.9467
EAS_AF	82.9467
EUR_AF	82.9467
SAS AF	82.9467
AA AF	83.2576
EA_AF	83.2576
CLIN SIG	93.6618
SOMATIC	75.6039
PHENO	69.9593
PUBMED	96.9385
MOTIF_NAME	100
MOTIF_POS	100
HIGH INF POS	100
MOTIF_SCORE_CHANGE	100
TRANSCRIPTION_FACTORS	100
ADR	0
ADA	0
GnmdREF	71.4422
GnmdALT	71.4422
GnmdAF	71.4422
GnmdAF	71.4422
PolyScore	17.9861
SIFTScore	18.0579
CCG	94.5228
VAF	0
GnomadHigh	0
dtype: float64

## Sheet: ANOVA
ANOVA test
	Input_Features	Score	P_Value
0	Unnamed: 0	19139.6	0
7	TLOD	238.381	0
14	ADA	232.88	0
8	Sample.AF	220.052	0
17	VAF	217.005	0
5	MPOS	204.715	0
9	Sample.DP	187.854	0
3	DP	184.446	0
6	POPAF	158.608	0
18	GnomadHigh	97.5091	0
13	ADR	89.1856	0
4	GERMQ	73.9684	0
16	SIFTScore	5.36375	0.0003
12	TSL	2.07377	0.0816
15	PolyScore	1.40933	0.2281
1	POS	1.37718	0.2392
